# Supplementary material for: Effect of Pharmacogenetic Testing for Statin Myopathy Risk vs Usual Care on Blood Cholesterol: A Randomized Clinical Trial
Source: PubMed Central journal article supplement (PMC7716196; doi:10.1001/jamanetworkopen.2020.27092), 2020-12-03
Supplement: jamanetwopen-e2027092-s002.pdf [file jamanetwopen-e2027092-s002.pdf]

## Supplemental Online Content

Vassy JL, Gaziano JM, Green RC, et al. Effect of pharmacogenetic testing for statin myopathy risk vs usual care on blood cholesterol: a randomized clinical trial. *JAMA Netw Open*. 2020;3(12):e2027092. doi:10.1001/jamanetworkopen.2020.27092

**eTable 1.** Evidence of Statin-Associated Muscle Symptoms (SAMS) in the Integrating Pharmacogenetics in Clinical Care (I-PICC) Study

**eTable 2.** Electronic Health Record (EHR) Documentation and Patient Communication Process Outcomes Among I-PICC Study Patient Participants in the Intervention (PGx+) Arm

**eTable 3.** Patient Beliefs About Medications and Test Results Recall at 12 Months

This supplemental material has been provided by the authors to give readers additional information about their work.

**eTable 1: Evidence of Statin-Associated Muscle Symptoms (SAMS) in the Integrating Pharmacogenetics in Clinical Care (I-PICC) Study**

|                                                                             | <b>Intervention (n=193)</b> | <b>Control (n=215)</b> |
|-----------------------------------------------------------------------------|-----------------------------|------------------------|
| Creatine kinase testing, n (%)                                              | 35 (18.1)                   | 32 (14.9)              |
| Provider-documented SAMS <sup>a</sup> , n (%)                               | 2 (1.0)                     | 3 (1.4)                |
| Creatine kinase testing among patients with provider-documented SAMS, n (%) | 2 (100.0)                   | 1 (33.3)               |
|                                                                             | <b>Intervention (n=169)</b> | <b>Control (n=203)</b> |
| Patient-reported SAMS <sup>b</sup> , n (%)                                  | 3 (1.8)                     | 3 (1.5)                |

<sup>a</sup>SAMS documentation abstracted from 12-month chart review.

<sup>b</sup>SAMS report assessed at 12-month patient survey (total completed surveys, n=372)

**eTable 2: Electronic Health Record (EHR) Documentation and Patient Communication Process Outcomes Among I-PICC Study Patient Participants in the Intervention (PGx+) Arm**

|                                                             | <b>PGx+ (n=193)</b> |
|-------------------------------------------------------------|---------------------|
| Results documentation by provider in EHR, <i>n</i> (%)      | 32 (16.6)           |
| Results communication to patient, <i>n</i> (%)              | 30 (15.5)           |
| Office visit, <i>n</i> (%)                                  | 4 (13.3)            |
| Templated letter, <i>n</i> (%)                              | 7 (23.3)            |
| Other letter, <i>n</i> (%)                                  | 18 (60.0)           |
| Telephone call, <i>n</i> (%)                                | 1 (3.3)             |
| Statin allergy documented in structured field, <i>n</i> (%) | 3 (1.6)             |

Outcomes observed during the 12 months after enrollment.

**eTable 3: Patient Beliefs About Medications and Test Results Recall at 12 Months**

|                                                                    |                   | <b>PGx+ (n=169)</b> | <b>PGx- (n=203)</b> |
|--------------------------------------------------------------------|-------------------|---------------------|---------------------|
| "My health in the future will depend on my medicines" <sup>a</sup> | Strongly agree    | 28 (16.6)           | 30 (14.8)           |
|                                                                    | Agree             | 65 (38.5)           | 84 (41.4)           |
|                                                                    | Uncertain         | 29 (17.2)           | 37 (18.2)           |
|                                                                    | Disagree          | 29 (17.2)           | 40 (19.7)           |
|                                                                    | Strongly disagree | 17 (10.1)           | 12 (5.9)            |
| "Medicines do more harm than good" <sup>a</sup>                    | Strongly agree    | 9 (5.3)             | 10 (4.9)            |
|                                                                    | Agree             | 26 (15.4)           | 20 (9.9)            |
|                                                                    | Uncertain         | 46 (27.2)           | 56 (27.6)           |
|                                                                    | Disagree          | 63 (37.3)           | 89 (43.8)           |
|                                                                    | Strongly disagree | 24 (14.2)           | 28 (13.8)           |
| Recall of PGx testing, n (%)                                       |                   | 11 (6.5)            |                     |
| Correct results recall, n (%) <sup>b</sup>                         |                   | 2 (18.2)            |                     |

Abbreviations: PGx, pharmacogenetic; PGx+, intervention arm; PGx-, control arm.

<sup>a</sup>One survey PGx+ participant did not respond to this question.

<sup>b</sup>Among participants reporting that they recalled undergoing genetic testing, the number who correctly recalled the interpretation of their *SLCO1B1* results.
