# Supplementary material for: Effect of Pharmacogenetic Testing for Statin Myopathy Risk vs Usual Care on Blood Cholesterol: A Randomized Clinical Trial
Source: PubMed Central journal article supplement (PMC7716196; doi:10.1001/jamanetworkopen.2020.27092), 2020-12-03
Supplement: jamanetwopen-e2027092-s003.pdf [file jamanetwopen-e2027092-s003.pdf]

# Data Sharing Statement

Vassy. Effect of Pharmacogenetic Testing for Statin Myopathy Risk vs Usual Care on Blood Cholesterol. *JAMA Netw Open*. Published December 03, 2020. 10.1001/jamanetworkopen.2020.27092

## Data

**Data available:** Yes

**Data types:** Deidentified participant data, Data dictionary

**How to access data:** Data will be available in a data repository accessible at the following URL:

<https://www.vacsp.research.va.gov/CSPEC/Studies/INVESTDR/Integrating-Pharmacogenetics-clinical-care-study.asp>

**When available:** With publication

## Supporting Documents

**Document types:** Statistical/analytic code, Informed consent form

**How to access documents:** Documents will be available in a data repository accessible at the following URL:

<https://www.vacsp.research.va.gov/CSPEC/Studies/INVESTDR/Integrating-Pharmacogenetics-clinical-care-study.asp>

**When available:** With publication

## Additional Information

**Who can access the data:** Data will be made available to researchers whose proposed use of the data has been approved.

**Types of analyses:** Data will be made available for non-commercial purposes.

**Mechanisms of data availability:** Data will be made available with investigator support after approval of a proposal.
